# Supplementary material
Source: PubMed Central journal article supplement (PMC4893994)
Supplement: NIHMS770330-supplement-11356_2016_6453_MOESM1_ESM.pdf [file NIHMS770330-supplement-11356_2016_6453_MOESM1_ESM.pdf]

## Transport stability of pesticides and PAHs sequestered in polyethylene passive sampling devices

Carey E. Donald<sup>1</sup>, Marc R. Elie<sup>1,2</sup>, Brian W. Smith<sup>1</sup>, Peter D. Hoffman<sup>1</sup>, and Kim A. Anderson<sup>1\*</sup>

<sup>1</sup> Environmental and Molecular Toxicology Department, Oregon State University, ALS 1007, Corvallis, OR 97331, United States

<sup>2</sup> *Present address:* Department of Pharmaceutical Sciences, Skaggs School of Pharmacy, University of Colorado Anschutz Medical Campus, Denver, CO 80045, United States

### Supplementary Information

#### Table of Contents.

Page 2.           **Table S1** Transport stability mean recovery, standard deviation, and sample size

Page 3.           **Fig S1** UV transmittance through PTFE bag

**Table S1** Transport stability mean recovery ( $\mu\text{g/L}$ ), standard deviation, and sample size. No values were significantly less than control (one-sided Dunnett's test)

|                     | control, t = 0 |                |                | t = 10 hours |                |                | t = 1.5 days |                |                | t = 3 days  |                |                | t = 7 days  |                |                | t = 14 days |  |  |
|---------------------|----------------|----------------|----------------|--------------|----------------|----------------|--------------|----------------|----------------|-------------|----------------|----------------|-------------|----------------|----------------|-------------|--|--|
| <b>-20° C</b>       |                | <b>Mean</b>    | <b>Std Dev</b> | <b>n</b>     | <b>Mean</b>    | <b>Std Dev</b> | <b>n</b>     | <b>Mean</b>    | <b>Std Dev</b> | <b>n</b>    | <b>Mean</b>    | <b>Std Dev</b> | <b>n</b>    |                |                |             |  |  |
| alachlor            |                | 467            | 35             | 4            | 466            | 49             | 4            | 463            | 18             | 4           | 431            | 10             | 4           |                |                |             |  |  |
| $\alpha$ -bhc       |                | 256            | 23             | 4            | 250            | 30             | 4            | 254            | 17             | 4           | 243            | 5              | 4           |                |                |             |  |  |
| chlorpyrifos        |                | 412            | 31             | 4            | 382            | 48             | 4            | 408            | 13             | 4           | 383            | 11             | 4           |                |                |             |  |  |
| endrin ketone       |                | 350            | 33             | 4            | 324            | 54             | 4            | 343            | 8              | 4           | 311            | 2              | 4           |                |                |             |  |  |
| anthracene          |                | 550            | 24             | 4            | 577            | 19             | 4            | 615            | 10             | 4           | 592            | 18             | 4           |                |                |             |  |  |
| fluoranthene        |                | 498            | 20             | 4            | 521            | 21             | 4            | 551            | 9              | 4           | 541            | 22             | 4           |                |                |             |  |  |
| chrysene            |                | 524            | 22             | 4            | 548            | 19             | 4            | 579            | 12             | 4           | 570            | 22             | 4           |                |                |             |  |  |
| benzo[ghi]-perylene |                | 506            | 22             | 4            | 532            | 20             | 4            | 565            | 11             | 4           | 557            | 21             | 4           |                |                |             |  |  |
| <b>4° C</b>         |                | <b>Mean</b>    | <b>Std Dev</b> | <b>n</b>     | <b>Mean</b>    | <b>Std Dev</b> | <b>n</b>     | <b>Mean</b>    | <b>Std Dev</b> | <b>n</b>    | <b>Mean</b>    | <b>Std Dev</b> | <b>n</b>    |                |                |             |  |  |
| alachlor            |                | 442            | 33             | 4            | 469            | 37             | 4            | 465            | 28             | 4           | 415            | 20             | 4           |                |                |             |  |  |
| $\alpha$ -bhc       |                | 247            | 21             | 4            | 260            | 25             | 4            | 254            | 17             | 4           | 233            | 15             | 4           |                |                |             |  |  |
| chlorpyrifos        |                | 391            | 31             | 4            | 406            | 33             | 4            | 417            | 29             | 4           | 367            | 23             | 4           |                |                |             |  |  |
| endrin ketone       |                | 323            | 26             | 4            | 328            | 22             | 4            | 339            | 19             | 4           | 297            | 22             | 4           |                |                |             |  |  |
| anthracene          |                | 546            | 18             | 4            | 603            | 10             | 4            | 601            | 32             | 4           | 581            | 38             | 4           |                |                |             |  |  |
| fluoranthene        |                | 489            | 14             | 4            | 535            | 9              | 4            | 533            | 28             | 4           | 524            | 35             | 4           |                |                |             |  |  |
| chrysene            |                | 512            | 16             | 4            | 562            | 9              | 4            | 561            | 29             | 4           | 553            | 36             | 4           |                |                |             |  |  |
| benzo[ghi]-perylene |                | 495            | 14             | 4            | 548            | 9              | 4            | 547            | 27             | 4           | 538            | 36             | 4           |                |                |             |  |  |
| <b>20° C</b>        | <b>Mean</b>    | <b>Std Dev</b> | <b>n</b>       | <b>Mean</b>  | <b>Std Dev</b> | <b>n</b>       | <b>Mean</b>  | <b>Std Dev</b> | <b>n</b>       | <b>Mean</b> | <b>Std Dev</b> | <b>n</b>       | <b>Mean</b> | <b>Std Dev</b> | <b>n</b>       |             |  |  |
| alachlor            | 452            | 46             | 8              | 461          | 29             | 4              | 469          | 33             | 4              | 456         | 5              | 4              | 432         | 10             | 4              |             |  |  |
| $\alpha$ -bhc       | 246            | 27             | 8              | 244          | 14             | 4              | 250          | 6              | 4              | 247         | 4              | 4              | 245         | 11             | 4              |             |  |  |
| chlorpyrifos        | 392            | 35             | 8              | 396          | 22             | 4              | 405          | 22             | 4              | 409         | 9              | 4              | 385         | 11             | 4              |             |  |  |
| endrin ketone       | 339            | 31             | 8              | 321          | 19             | 4              | 330          | 17             | 4              | 338         | 10             | 4              | 310         | 15             | 4              |             |  |  |
| anthracene          | 572            | 17             | 8              | 571          | 19             | 4              | 606          | 25             | 4              | 609         | 27             | 4              | 592         | 25             | 4              |             |  |  |
| fluoranthene        | 519            | 20             | 8              | 507          | 17             | 4              | 539          | 23             | 4              | 540         | 23             | 4              | 533         | 23             | 4              |             |  |  |
| chrysene            | 541            | 20             | 8              | 531          | 18             | 4              | 565          | 22             | 4              | 569         | 25             | 4              | 563         | 24             | 4              |             |  |  |
| benzo[ghi]-perylene | 521            | 18             | 8              | 516          | 15             | 4              | 550          | 22             | 4              | 553         | 22             | 4              | 547         | 18             | 4              |             |  |  |
| <b>35° C</b>        |                | <b>Mean</b>    | <b>Std Dev</b> | <b>n</b>     | <b>Mean</b>    | <b>Std Dev</b> | <b>n</b>     | <b>Mean</b>    | <b>Std Dev</b> | <b>n</b>    | <b>Mean</b>    | <b>Std Dev</b> | <b>n</b>    | <b>Mean</b>    | <b>Std Dev</b> | <b>n</b>    |  |  |
| alachlor            |                | 446            | 21             | 4            | 492            | 8              | 4            | 438            | 22             | 4           | 433            | 34             | 4           | 440            | 25             | 4           |  |  |
| $\alpha$ -bhc       |                | 253            | 6              | 4            | 278            | 10             | 4            | 248            | 12             | 4           | 243            | 17             | 4           | 251            | 16             | 4           |  |  |
| chlorpyrifos        |                | 401            | 16             | 4            | 436            | 10             | 4            | 394            | 19             | 4           | 390            | 25             | 4           | 402            | 23             | 4           |  |  |
| endrin ketone       |                | 325            | 15             | 4            | 352            | 20             | 4            | 320            | 12             | 4           | 310            | 20             | 4           | 329            | 14             | 4           |  |  |
| anthracene          |                | 577            | 7              | 4            | 620            | 19             | 4            | 605            | 24             | 4           | 616            | 10             | 4           | 553            | 24             | 4           |  |  |
| fluoranthene        |                | 510            | 6              | 4            | 548            | 7              | 4            | 537            | 21             | 4           | 548            | 11             | 4           | 491            | 22             | 4           |  |  |
| chrysene            |                | 534            | 5              | 4            | 574            | 2              | 4            | 567            | 22             | 4           | 576            | 15             | 4           | 520            | 23             | 4           |  |  |
| benzo[ghi]-perylene |                | 519            | 6              | 4            | 557            | 2              | 4            | 551            | 23             | 4           | 558            | 14             | 4           | 503            | 24             | 4           |  |  |

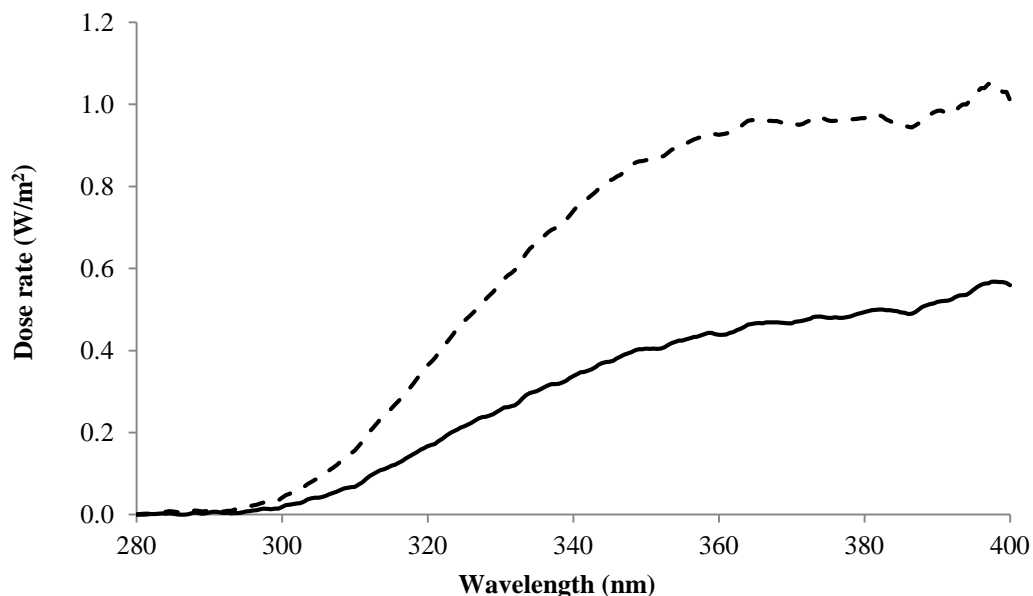

**Fig S1** UV transmittance through PTFE bags. Presented data represent a reference spectrum with the sensor uncovered (dashed line) and the test spectrum collected through one-layer of PTFE bag material (solid line). PTFE bag attenuates UVA and UVB transmittance by 49%.

#### UV Transmittance Test

The irradiation system consisted of a 1000 W xenon arc lamp housed in an Oriel model 6140 lamp housing, driven by an Oriel model 8540 arc lamp power supply. The quasi-collimated UV beam passes through a water-cooled 10 cm aqueous filter to remove infrared radiation and two layers of 4 mm Solarphire PV annealed glass (Pittsburg Paint and Glass, Pittsburg PA) to remove UVC and modulate UVB and UVA wavelengths. Intensity of the UV region of the resultant spectrum (290 – 400 nm) is tuned to 68 W/m<sup>2</sup>, equivalent to the OECD standard dose rate, and has a UVA:UVB ratio of approximately 20. The spectrum closely resembles the solar spectrum for mid-July at Corvallis OR, 44.5667°N latitude, 123.2833°W longitude. Spectral output was measured with a Black-Comet C-50 UV-Vis spectrometer (StellarNet Inc, Tampa FL, USA) running SpectraWiz™ software.
